# Supplementary material for: Managing Occupational Health Issues through Coaching, Emerging Perspectives from Emergency and Intensive Care Nurses: A Mixed-Method Study
Source: MDPI journal article supplement (doi:10.3390/nursrep13030094), 2023-08-14
Supplement: s1 [file s1]

10. What do you think about supporting nurses in the structure where you work ?

11. Why is there a lack of health coaching?: .....  
.....

#### **Axis IV: The methods of supporting nurses**

12. Do you protect yourself against stress, burnout and depression at your workplace?

Yes ☐                      No ☐                      If yes,  
how?: .....  
.....

13 .Can you relieve your professional stress after work hours ? :

.....  
Yes ☐                      No ☐  
If yes, how ? :.....

#### **Axis V: The feasibility of implementing a coaching model dedicated to nurses working in emergency and intensive care unit:**

14. To what extent can health coaching alleviate burnout?

.....

15. What could hinder a coaching intervention ?

.....

16. What are your expectations of the coaching model ?

.....

17. Do you have any additional comments ?

.....
